# Supplementary material
Source: PubMed Central journal article supplement (PMC1865582)

# Supplementary Figure 1

1) Assign intergenic regulatory regions to genes

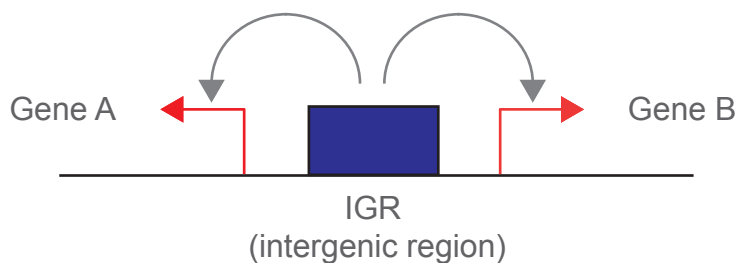

2) Order genes by expression in condition of interest and rank based on PBM p-value for TF

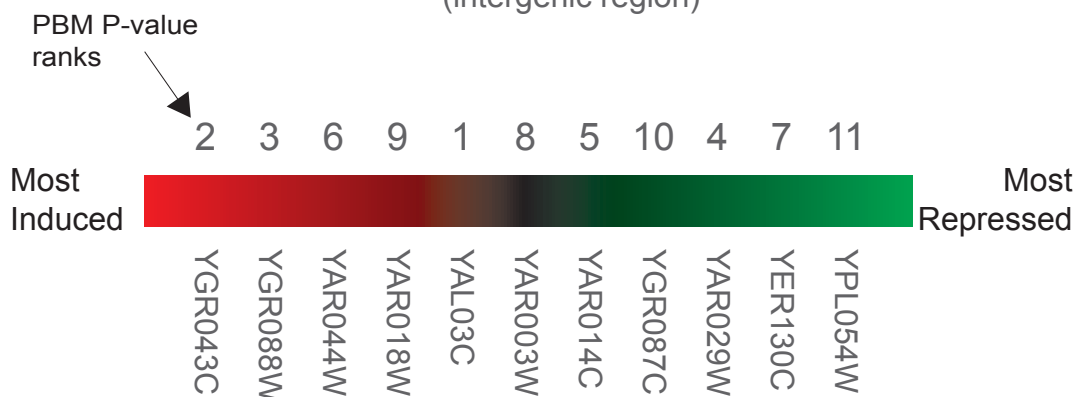

3) Choose a window of similarly expressed foreground genes and a length-matched background set

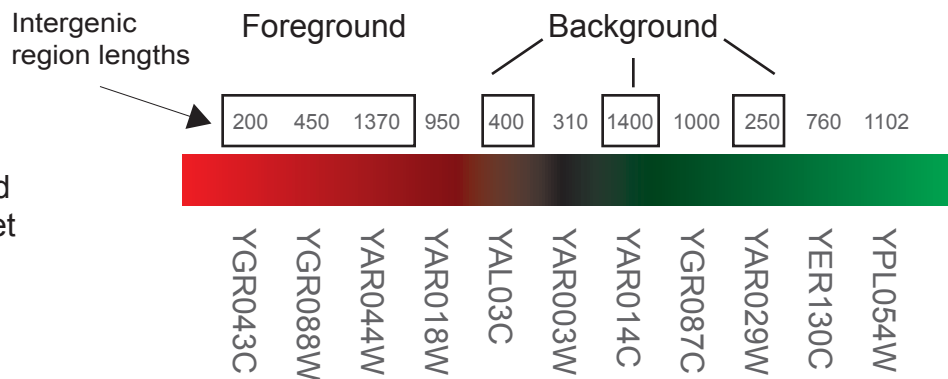

4) Slide window along ordered expression, calculating a mean-centered AUC statistic for enrichment of PBM targets within each window.

5) Plot AUC statistic at each window and determine condition significance by a predetermined threshold (dotted line:  $P < 0.001$ )

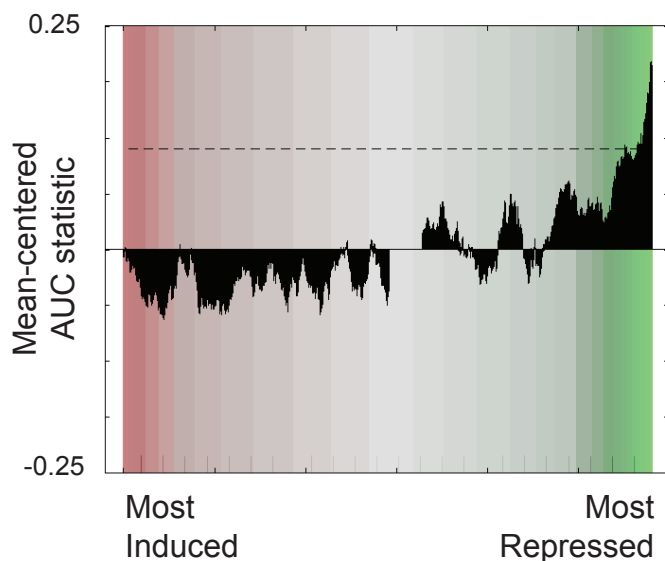

Supplement: msb4100140-s1.pdf [file msb4100140-s1.pdf]
