# Supplementary material
Source: PubMed Central journal article supplement (PMC1865582)
Supplement: msb4100140-s2.pdf [file msb4100140-s2.pdf]

## Supplementary Figure 2

### Rap1 target intergenic regions

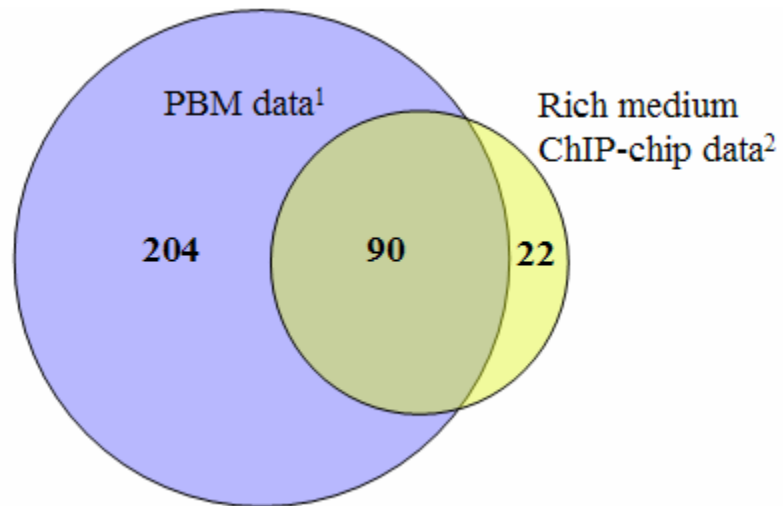

**Supplementary Figure 2.** Comparison of target IGRs derived from PBM data (Bonferroni corrected  $p < 0.001$ ) and ChIP-chip data ( $p < 0.001$ ) for Rap1. References: <sup>1</sup>Mukherjee et al., 2004; <sup>2</sup>Harbison et al., 2004
