# Supplementary material
Source: PubMed Central journal article supplement (PMC1865582)

### Supplementary Figure 5

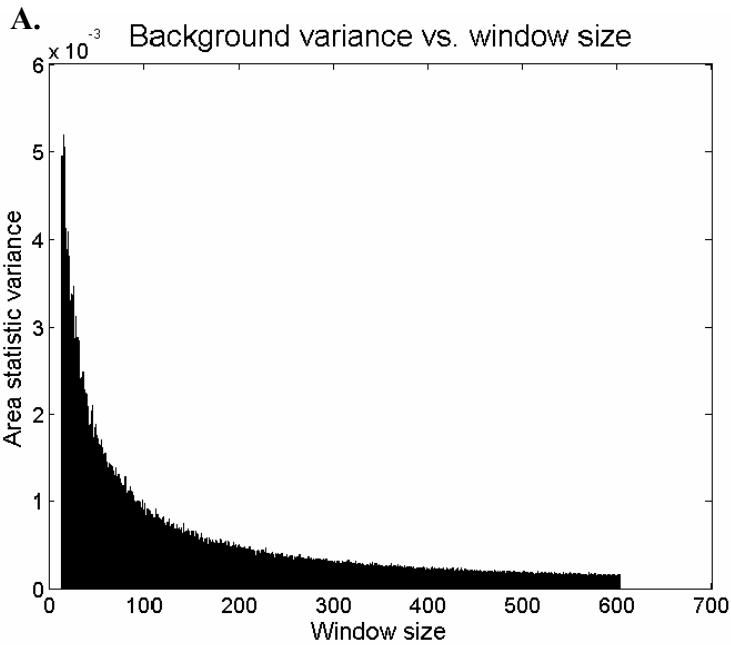

**Supplementary Figure 5.** The effect of increasing window sizes on **(A)** the variance of enrichment scores (area statistic) for a set of 2000 randomly ordered genes and **(B)** the maximum area statistic for enrichment of Mig1 targets among glucose-repressed genes.

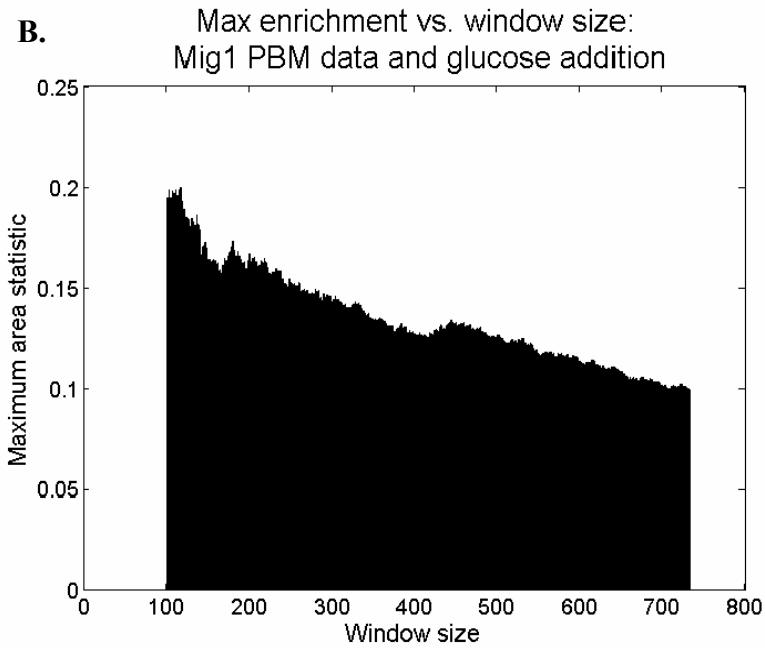

Supplement: msb4100140-s5.pdf [file msb4100140-s5.pdf]
