# Supplementary material
Source: PubMed Central journal article supplement (PMC1865582)
Supplement: msb4100140-s7.pdf [file msb4100140-s7.pdf]

**Supplementary Table I**

| Window size | Extreme value distribution parameters |          |         | Area Significance threshold |            |
|-------------|---------------------------------------|----------|---------|-----------------------------|------------|
|             | $\mu$                                 | $\sigma$ | $k$     | $p < 0.001$                 | $p < 0.01$ |
| 50          | 0.1228                                | 0.0128   | -0.0763 | 0.1915                      | 0.1725     |
| 100         | 0.0818                                | 0.0108   | -0.123  | 0.1317                      | 0.1195     |
| 150         | 0.0636                                | 0.00874  | -0.0825 | 0.1094                      | 0.0971     |
| 200         | 0.0525                                | 0.0080   | -0.0626 | 0.095                       | 0.08435    |
| 250         | 0.0459                                | 0.00726  | -0.1248 | 0.0794                      | 0.0713     |
| 300         | 0.0402                                | 0.00693  | -0.101  | 0.07455                     | 0.06575    |

**Supplementary Table I.** Significance thresholds and generalized extreme value distribution parameters for varying foreground window sizes. These values were determined by permutation testing with 1000 sets of randomized PBM ranks in the CRACR analysis. The thresholds for the area statistic indicated were used in determining significance of an expression condition analyzed with real PBM data.
